# Supplementary material for: Energetic Value of Elymus elongatus L. and Zea mays L. Grown on Soil Polluted with Ni2+, Co2+, Cd2+, and Sensitivity of Rhizospheric Bacteria to Heavy Metals
Source: MDPI journal article supplement (doi:10.3390/en14164903), 2021-08-11
Supplement: s1 [file s1]

## Article

# Energetic Value of *Elymus elongatus* L. and *Zea mays* L. Grown on Soil Polluted with Ni<sup>2+</sup>, Co<sup>2+</sup>, Cd<sup>2+</sup>, and Sensitivity of Rhizospheric Bacteria to Heavy Metals

Edyta Boros-Lajszner, Jadwiga Wyszowska \*, Agata Borowik and Jan Kucharski

Department of Soil Science and Microbiology, University of Warmia and Mazury in Olsztyn, Plac Łódzki 3, 10-727 Olsztyn, Poland; edyta.boros@uwm.edu.pl (E.B.-L.); agata.borowik@uwm.edu.pl (A.B.); jan.kucharski@uwm.edu.pl (J.K.)

\* Correspondence: jadwiga.wyszowska@uwm.edu.pl; Tel.: +48-89-5234938

**Citation:** Boros-Lajszner, E.; Wyszowska, J.; Borowik, A.; Kucharski, J. Energetic Value of *Elymus elongatus* L. and *Zea mays* L. Grown on Soil Polluted with Ni<sup>2+</sup>, Co<sup>2+</sup>, Cd<sup>2+</sup> Nickel, Cobalt, and Cadmium Ions, and Sensitivity of Rhizospheric Bacteria to Heavy Metals. *Energies* **2021**, *14*, 4903. <https://doi.org/10.3390/en14164903>

Academic Editor: Firstname  
Lastname

Received: 5 July 2021  
Accepted: 9 August 2021  
Published: 11 August 2021

**Publisher's Note:** MDPI stays neutral with regard to jurisdictional claims in published maps and institutional affiliations.

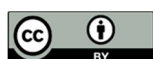

**Copyright:** © 2021 by the authors. Submitted for possible open access publication under the terms and conditions of the Creative Commons Attribution (CC BY) license (<https://creativecommons.org/licenses/by/4.0/>).

**Table S1.** Microbial count (cfu) in 1 kg d.m. of the soil sown with *Elymus elongatus* L. and *Zea mays* L.

| Heavy metals               | Org<br>· 10 <sup>8</sup> | Act                  | Fun<br>· 10 <sup>6</sup> |
|----------------------------|--------------------------|----------------------|--------------------------|
| <i>Elymus elongatus</i> L. |                          |                      |                          |
| C                          | 35.320 <sup>d</sup>      | 43.427 <sup>bc</sup> | 24.321 <sup>e</sup>      |
| Ni <sup>2+</sup>           | 44.584 <sup>a</sup>      | 48,197 <sup>a</sup>  | 36.136 <sup>d</sup>      |
| Co <sup>2+</sup>           | 35.738 <sup>cd</sup>     | 45.968 <sup>ab</sup> | 35.177 <sup>d</sup>      |
| Cd <sup>2+</sup>           | 41.885 <sup>ab</sup>     | 43.490 <sup>bc</sup> | 44.624 <sup>b</sup>      |
| <i>Zea mays</i> L.         |                          |                      |                          |
| C                          | 28.567 <sup>e</sup>      | 43.531 <sup>b</sup>  | 53.287 <sup>a</sup>      |
| Ni <sup>2+</sup>           | 33.943 <sup>d</sup>      | 29.357 <sup>e</sup>  | 40.892 <sup>c</sup>      |
| Co <sup>2+</sup>           | 28.328 <sup>e</sup>      | 35.689 <sup>d</sup>  | 43.889 <sup>bc</sup>     |
| Cd <sup>2+</sup>           | 39.779 <sup>bc</sup>     | 40.110 <sup>c</sup>  | 50.421 <sup>a</sup>      |

Org – organotrophic bacteria; Act – actinobacteria; Fun – fungi. \*C – control soil; Ni<sup>2+</sup> – soil contaminated with nickel; Co<sup>2+</sup> – soil contaminated with cobalt; Cd<sup>2+</sup> – soil contaminated with cadmium. For each group of microorganisms, the same letters (a – e) are assigned to the same homogeneous groups.
