# Supplementary material for: Energetic Value of Elymus elongatus L. and Zea mays L. Grown on Soil Polluted with Ni2+, Co2+, Cd2+, and Sensitivity of Rhizospheric Bacteria to Heavy Metals
Source: MDPI journal article supplement (doi:10.3390/en14164903), 2021-08-11
Supplement: s1 [file s1]

Archive with 1 entries (1 files):
- energies-1307935-supplementary.pdf
